# Supplementary material
Source: PubMed Central journal article supplement (PMC8612286)
Supplement: aem.01575-21-s0001.pdf [file aem.01575-21-s0001.pdf]

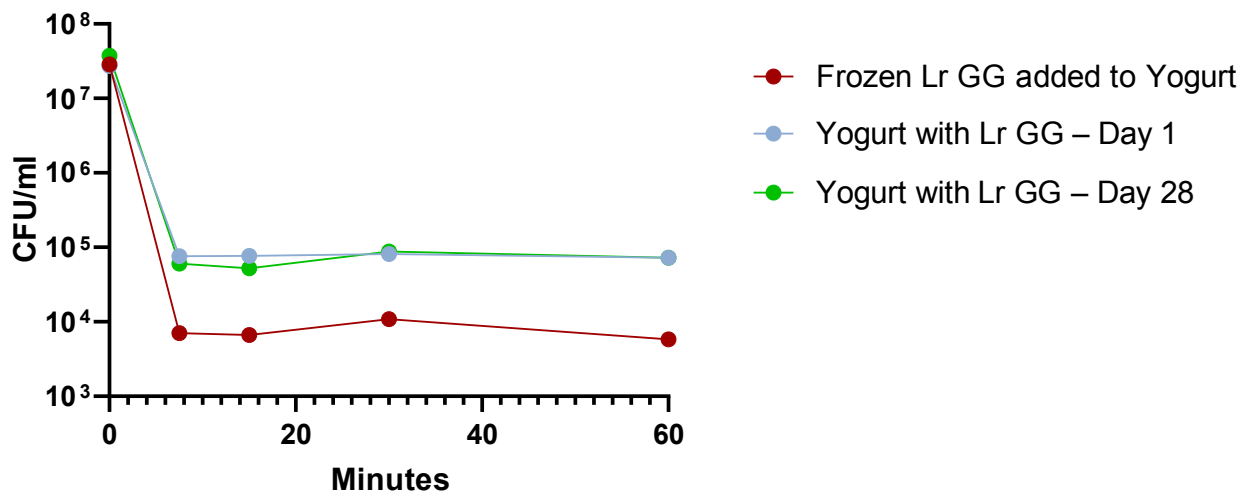

Supplementary figure 1. Survival of *L. rhamnosus* GG in yogurt when incubated in 1% porcine bile for 1 hour. Samples included frozen *L. rhamnosus* GG added to yogurt immediately before treatment (Frozen Lr GG added to Yogurt) and yogurt co-fermented with *L. rhamnosus* GG, both from the day of production (Yogurt with Lr GG – Day 1) and at the end of shelf life (Yogurt with Lr GG – Day 28). Results are shown as CFU/ml (Y-axis) after 7.5, 15, 30 and 60 minutes (X-axis) in 1% porcine bile solution. For each treatment a control is included (X=0).

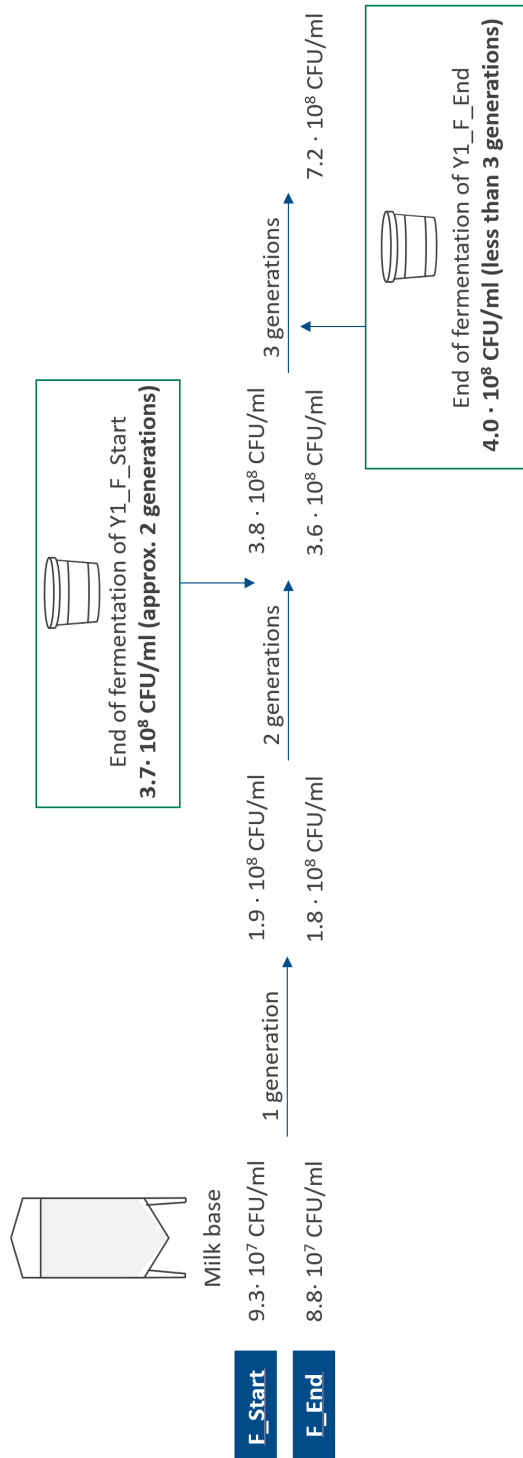

Supplementary figure 2 Number of generations of *L. rhamnosus* GG when co-fermented in yogurt.

Supplementary table 1 Accession numbers of sequenced data. All DNA sequence data are stored at the National Center for Biotechnology information database under series accession number PRJNA762716.

| accession   | bioproject_accession | biosample_accession | library_ID            | library_layout | instrument_model      |
|-------------|----------------------|---------------------|-----------------------|----------------|-----------------------|
| SRR15862625 | PRJNA762716          | SAMN21404543        | F_start_ON            | paired         | Illumina NovaSeq 6000 |
| SRR15862624 | PRJNA762716          | SAMN21404544        | F_start_isolate1      | paired         | Illumina NovaSeq 6000 |
| SRR15862613 | PRJNA762716          | SAMN21404545        | F_start_isolate10     | paired         | Illumina NovaSeq 6000 |
| SRR15862602 | PRJNA762716          | SAMN21404546        | F_start_isolate2      | paired         | Illumina NovaSeq 6000 |
| SRR15862591 | PRJNA762716          | SAMN21404547        | F_start_isolate3      | paired         | Illumina NovaSeq 6000 |
| SRR15862646 | PRJNA762716          | SAMN21404548        | F_start_isolate4      | paired         | Illumina NovaSeq 6000 |
| SRR15862635 | PRJNA762716          | SAMN21404549        | F_start_isolate5      | paired         | Illumina NovaSeq 6000 |
| SRR15862628 | PRJNA762716          | SAMN21404550        | F_start_isolate6      | paired         | Illumina NovaSeq 6000 |
| SRR15862627 | PRJNA762716          | SAMN21404551        | F_start_isolate7      | paired         | Illumina NovaSeq 6000 |
| SRR15862626 | PRJNA762716          | SAMN21404552        | F_start_isolate8      | paired         | Illumina NovaSeq 6000 |
| SRR15862623 | PRJNA762716          | SAMN21404553        | F_start_isolate9      | paired         | Illumina NovaSeq 6000 |
| SRR15862622 | PRJNA762716          | SAMN21404554        | F_end_ON              | paired         | Illumina NovaSeq 6000 |
| SRR15862621 | PRJNA762716          | SAMN21404555        | F_end_isolate1        | paired         | Illumina NovaSeq 6000 |
| SRR15862620 | PRJNA762716          | SAMN21404556        | F_end_isolate10       | paired         | Illumina NovaSeq 6000 |
| SRR15862619 | PRJNA762716          | SAMN21404557        | F_end_isolate2        | paired         | Illumina NovaSeq 6000 |
| SRR15862618 | PRJNA762716          | SAMN21404558        | F_end_isolate3        | paired         | Illumina NovaSeq 6000 |
| SRR15862617 | PRJNA762716          | SAMN21404559        | F_end_isolate4        | paired         | Illumina NovaSeq 6000 |
| SRR15862616 | PRJNA762716          | SAMN21404560        | F_end_isolate5        | paired         | Illumina NovaSeq 6000 |
| SRR15862615 | PRJNA762716          | SAMN21404561        | F_end_isolate6        | paired         | Illumina NovaSeq 6000 |
| SRR15862614 | PRJNA762716          | SAMN21404562        | F_end_isolate7        | paired         | Illumina NovaSeq 6000 |
| SRR15862612 | PRJNA762716          | SAMN21404563        | F_end_isolate8        | paired         | Illumina NovaSeq 6000 |
| SRR15862611 | PRJNA762716          | SAMN21404564        | F_end_isolate9        | paired         | Illumina NovaSeq 6000 |
| SRR15862610 | PRJNA762716          | SAMN21404565        | Y1_F_start_Isolate1   | paired         | Illumina NovaSeq 6000 |
| SRR15862609 | PRJNA762716          | SAMN21404566        | Y1_F_start_Isolate10  | paired         | Illumina NovaSeq 6000 |
| SRR15862608 | PRJNA762716          | SAMN21404567        | Y1_F_start_Isolate2   | paired         | Illumina NovaSeq 6000 |
| SRR15862607 | PRJNA762716          | SAMN21404568        | Y1_F_start_Isolate3   | paired         | Illumina NovaSeq 6000 |
| SRR15862606 | PRJNA762716          | SAMN21404569        | Y1_F_start_Isolate4   | paired         | Illumina NovaSeq 6000 |
| SRR15862605 | PRJNA762716          | SAMN21404570        | Y1_F_start_Isolate5   | paired         | Illumina NovaSeq 6000 |
| SRR15862604 | PRJNA762716          | SAMN21404571        | Y1_F_start_Isolate6   | paired         | Illumina NovaSeq 6000 |
| SRR15862603 | PRJNA762716          | SAMN21404572        | Y1_F_start_Isolate7   | paired         | Illumina NovaSeq 6000 |
| SRR15862601 | PRJNA762716          | SAMN21404573        | Y1_F_start_Isolate8   | paired         | Illumina NovaSeq 6000 |
| SRR15862600 | PRJNA762716          | SAMN21404574        | Y1_F_start_Isolate9   | paired         | Illumina NovaSeq 6000 |
| SRR15862599 | PRJNA762716          | SAMN21404575        | Y1_F_start_IsolateON  | paired         | Illumina NovaSeq 6000 |
| SRR15862598 | PRJNA762716          | SAMN21404576        | Y28_F_start_Isolate1  | paired         | Illumina NovaSeq 6000 |
| SRR15862597 | PRJNA762716          | SAMN21404577        | Y28_F_start_Isolate10 | paired         | Illumina NovaSeq 6000 |
| SRR15862596 | PRJNA762716          | SAMN21404578        | Y28_F_start_Isolate2  | paired         | Illumina NovaSeq 6000 |
| SRR15862595 | PRJNA762716          | SAMN21404579        | Y28_F_start_Isolate3  | paired         | Illumina NovaSeq 6000 |
| SRR15862594 | PRJNA762716          | SAMN21404580        | Y28_F_start_Isolate4  | paired         | Illumina NovaSeq 6000 |
| SRR15862593 | PRJNA762716          | SAMN21404581        | Y28_F_start_Isolate5  | paired         | Illumina NovaSeq 6000 |
| SRR15862592 | PRJNA762716          | SAMN21404582        | Y28_F_start_Isolate6  | paired         | Illumina NovaSeq 6000 |
| SRR15862590 | PRJNA762716          | SAMN21404583        | Y28_F_start_Isolate7  | paired         | Illumina NovaSeq 6000 |
| SRR15862655 | PRJNA762716          | SAMN21404584        | Y28_F_start_Isolate8  | paired         | Illumina NovaSeq 6000 |
| SRR15862654 | PRJNA762716          | SAMN21404585        | Y28_F_start_Isolate9  | paired         | Illumina NovaSeq 6000 |
| SRR15862653 | PRJNA762716          | SAMN21404586        | Y28_F_start_IsolateON | paired         | Illumina NovaSeq 6000 |
| SRR15862652 | PRJNA762716          | SAMN21404587        | Y1_F_end_Isolate1     | paired         | Illumina NovaSeq 6000 |
| SRR15862651 | PRJNA762716          | SAMN21404588        | Y1_F_end_Isolate10    | paired         | Illumina NovaSeq 6000 |
| SRR15862650 | PRJNA762716          | SAMN21404589        | Y1_F_end_Isolate2     | paired         | Illumina NovaSeq 6000 |
| SRR15862649 | PRJNA762716          | SAMN21404590        | Y1_F_end_Isolate3     | paired         | Illumina NovaSeq 6000 |
| SRR15862648 | PRJNA762716          | SAMN21404591        | Y1_F_end_Isolate4     | paired         | Illumina NovaSeq 6000 |
| SRR15862647 | PRJNA762716          | SAMN21404592        | Y1_F_end_Isolate5     | paired         | Illumina NovaSeq 6000 |
| SRR15862645 | PRJNA762716          | SAMN21404593        | Y1_F_end_Isolate6     | paired         | Illumina NovaSeq 6000 |
| SRR15862644 | PRJNA762716          | SAMN21404594        | Y1_F_end_Isolate7     | paired         | Illumina NovaSeq 6000 |
| SRR15862643 | PRJNA762716          | SAMN21404595        | Y1_F_end_Isolate8     | paired         | Illumina NovaSeq 6000 |
| SRR15862642 | PRJNA762716          | SAMN21404596        | Y1_F_end_Isolate9     | paired         | Illumina NovaSeq 6000 |
| SRR15862641 | PRJNA762716          | SAMN21404597        | Y1_F_end_IsolateON    | paired         | Illumina NovaSeq 6000 |
| SRR15862640 | PRJNA762716          | SAMN21404598        | Y28_F_end_Isolate1    | paired         | Illumina NovaSeq 6000 |
| SRR15862639 | PRJNA762716          | SAMN21404599        | Y28_F_end_Isolate10   | paired         | Illumina NovaSeq 6000 |
| SRR15862638 | PRJNA762716          | SAMN21404600        | Y28_F_end_Isolate2    | paired         | Illumina NovaSeq 6000 |
| SRR15862637 | PRJNA762716          | SAMN21404601        | Y28_F_end_Isolate3    | paired         | Illumina NovaSeq 6000 |
| SRR15862636 | PRJNA762716          | SAMN21404602        | Y28_F_end_Isolate4    | paired         | Illumina NovaSeq 6000 |
| SRR15862634 | PRJNA762716          | SAMN21404603        | Y28_F_end_Isolate5    | paired         | Illumina NovaSeq 6000 |
| SRR15862633 | PRJNA762716          | SAMN21404604        | Y28_F_end_Isolate6    | paired         | Illumina NovaSeq 6000 |
| SRR15862632 | PRJNA762716          | SAMN21404605        | Y28_F_end_Isolate7    | paired         | Illumina NovaSeq 6000 |
| SRR15862631 | PRJNA762716          | SAMN21404606        | Y28_F_end_Isolate8    | paired         | Illumina NovaSeq 6000 |
| SRR15862630 | PRJNA762716          | SAMN21404607        | Y28_F_end_Isolate9    | paired         | Illumina NovaSeq 6000 |
| SRR15862629 | PRJNA762716          | SAMN21404608        | Y28_F_end_IsolateON   | paired         | Illumina NovaSeq 6000 |

Supplementary table 2 Adjusted p-values from multiple comparison of IL-10, IL-8, IL-6, TNF- $\alpha$ , IL-12p70 and IL-1 $\beta$  using two-way ANOVA followed by Tukey's test. Cells containing p-values are presented with a color gradient for level of significance as depicted in the key.

|                                                   | IL-10   |         |         | IL-8    |         |         | IL-6    |         |         | TNF- $\alpha$ |         |         | IL-12   |         |         | IL-1 $\beta$ |         |         |                        |
|---------------------------------------------------|---------|---------|---------|---------|---------|---------|---------|---------|---------|---------------|---------|---------|---------|---------|---------|--------------|---------|---------|------------------------|
|                                                   | Donor A | Donor B | Donor C | Donor A | Donor B | Donor C | Donor A | Donor B | Donor C | Donor A       | Donor B | Donor C | Donor A | Donor B | Donor C | Donor A      | Donor B | Donor C |                        |
| Frozen Lr GG vs. Frozen Lb + St                   | <0.0001 | <0.0001 | <0.0001 | <0.0001 | <0.0001 | <0.0001 | <0.0001 | <0.0001 | <0.0001 | <0.0001       | 0.0165  | <0.0001 | <0.0001 | 0.9808  | 0.0003  | <0.0001      | <0.0001 | <0.0001 |                        |
| Frozen Lr GG vs. Frozen Lb + St + Lr GG           | 0.2253  | <0.0001 | <0.0001 | <0.0001 | 0.0263  | <0.0001 | <0.0001 | <0.0001 | <0.0001 | 0.0223        | 0.0182  | 0.0011  | <0.0001 | 0.9359  | <0.0001 | 0.0002       | <0.0001 | <0.0001 |                        |
| Frozen Lr GG vs. Yogurt Lb + St                   | <0.0001 | <0.0001 | <0.0001 | <0.0001 | <0.0001 | <0.0001 | <0.0001 | <0.0001 | <0.0001 | <0.0001       | 0.9947  | 0.0326  | <0.0001 | >0.9999 | 0.9694  | <0.0001      | 0.0001  | <0.0001 |                        |
| Frozen Lr GG vs. Yogurt Lb + St + Lr GG           | <0.0001 | 0.073   | 0.9935  | <0.0001 | 0.0386  | <0.0001 | <0.0001 | <0.0001 | <0.0001 | >0.9999       | 0.866   | <0.0001 | >0.9999 | 0.8843  | <0.0001 | <0.0001      | <0.0001 | <0.0001 |                        |
| Frozen Lr GG vs. Negative control                 | 0.9965  | 0.0577  | 0.4284  | 0.0024  | 0.0054  | 0.1148  | 0.854   | 0.0015  | 0.0011  | 0.9502        | 0.9999  | 0.9999  | >0.9999 | >0.9999 | 0.9999  | 0.9892       | 0.7175  | 0.9995  |                        |
| Frozen Lb + St vs. Frozen Lb + St + Lr GG         | <0.0001 | <0.0001 | <0.0001 | <0.0001 | 0.0052  | 0.9978  | <0.0001 | 0.0009  | 0.8756  | <0.0001       | >0.9999 | 0.1531  | <0.0001 | >0.9999 | 0.9296  | <0.0001      | 0.8342  | <0.0001 |                        |
| Frozen Lb + St vs. Yogurt Lb + St                 | 0.0952  | <0.0001 | <0.0001 | >0.9999 | <0.0001 | <0.0001 | <0.0001 | 0.6843  | 0.4016  | 0.7045        | 0.0599  | 0.0075  | <0.0001 | 0.995   | 0.0032  | 0.9133       | 0.0636  | <0.0001 |                        |
| Frozen Lb + St vs. Yogurt Lb + St + Lr GG         | 0.0004  | <0.0001 | <0.0001 | <0.0001 | 0.0034  | 0.999   | 0.0653  | <0.0001 | <0.0001 | 0.0014        | 0.0269  | <0.0001 | <0.0001 | 0.9959  | 0.0074  | 0.3165       | 0.8846  | 0.0001  |                        |
| Frozen Lb + St vs. Negative control               | <0.0001 | <0.0001 | <0.0001 | <0.0001 | <0.0001 | <0.0001 | <0.0001 | <0.0001 | <0.0001 | 0.0086        | <0.0001 | <0.0001 | <0.0001 | 0.986   | 0.0002  | <0.0001      | <0.0001 | <0.0001 |                        |
| Frozen Lb + St + Lr GG vs. Yogurt Lb + St         | <0.0001 | 0.1003  | 0.0334  | <0.0001 | <0.0001 | <0.0001 | <0.0001 | 0.0453  | 0.961   | <0.0001       | 0.0652  | 0.7998  | <0.0001 | 0.9737  | 0.0002  | <0.0001      | 0.0028  | <0.0001 |                        |
| Frozen Lb + St + Lr GG vs. Yogurt Lb + St + Lr GG | <0.0001 | <0.0001 | <0.0001 | <0.0001 | >0.9999 | 0.9645  | <0.0001 | 0.15    | <0.0001 | <0.0001       | 0.0295  | 0.0231  | <0.0001 | 0.9769  | 0.0005  | 0.0038       | 0.2272  | <0.0001 |                        |
| Frozen Lb + St + Lr GG vs. Negative control       | 0.1432  | <0.0001 | <0.0001 | <0.0001 | <0.0001 | <0.0001 | <0.0001 | <0.0001 | <0.0001 | 0.0057        | 0.0095  | 0.0005  | <0.0001 | 0.9484  | <0.0001 | <0.0001      | <0.0001 | <0.0001 | 0.001 > value > 0.0001 |
| Yogurt Lb + St vs. Yogurt Lb + St + Lr GG         | <0.0001 | <0.0001 | <0.0001 | 0.0001  | <0.0001 | <0.0001 | 0.0003  | <0.0001 | 0.0006  | 0.0625        | 0.9994  | 0.3296  | <0.0001 | >0.9999 | 0.9996  | 0.041        | 0.4655  | <0.0001 | 0.01 > value > 0.001   |
| Yogurt Lb + St vs. Negative control               | <0.0001 | <0.0001 | <0.0001 | <0.0001 | <0.0001 | <0.0001 | <0.0001 | <0.0001 | <0.0001 | 0.97          | 0.0176  | <0.0001 | >0.9999 | 0.9084  | <0.0001 | <0.0001      | <0.0001 | <0.0001 | 0.05 > value > 0.01    |
| Yogurt Lb + St + Lr GG vs. Negative control       | <0.0001 | >0.9999 | 0.1726  | <0.0001 | <0.0001 | <0.0001 | <0.0001 | <0.0001 | <0.0001 | 0.9977        | 0.7409  | <0.0001 | >0.9999 | 0.7694  | <0.0001 | <0.0001      | <0.0001 | <0.0001 | >0.05                  |

Supplementary table 3 The table presents the SNPs detected among 60 *L. rhamnosus* GG isolates. From left to right, the columns show the number of isolates in which the SNP was detected, the genomic position of the nucleotide, the alleles and the amino acids they encode, the gene ID and gene product and finally the predictive conclusion based on physio-chemical properties of the mutated amino acid. SNPs at genomic positions 1030390, 2765383, 1611713, 630726 and 877994 were previously identified to represent a sub-population in the strain (Stage, M., Wichmann, A., Jørgensen, M., Vera-jiménez, N. I. & Wielje, M. (2020). *Lactobacillus rhamnosus* GG Genomic and Phenotypic Stability. AEM, 86,6.)

| No. of isolates with SNP | Genomic position | Reference nucleotide | Mutated nucleotide | Reference amino acid | Mutated amino acid | Gene ID | Gene product                                                   | Amino acid substitution consequence |
|--------------------------|------------------|----------------------|--------------------|----------------------|--------------------|---------|----------------------------------------------------------------|-------------------------------------|
| 26                       | 1030390          | T                    | G                  | Histidine            | Glutamine          | camS    | Lipoprotein                                                    | Neutral                             |
| 26                       | 2765383          | G                    | A                  | Histidine            | Tyrosine           | glvA    | Maltose-6'-phosphate glucosidase                               | Neutral                             |
| 13                       | 2253036          | A                    | G                  | Aspartic acid        | Glycine            | CcmA    | ABC transporter, multidrug transporter ATPase component        | Deleterious                         |
| 10                       | 1611713          | T                    | C                  | Glutamine            | Arginine           | NA      | Putative protein without homology                              | Neutral                             |
| 5                        | 630729           | A                    | T                  | Glutamine            | Leucine            | NA      | Conserved protein                                              | Neutral                             |
| 2                        | 877994           | C                    | T                  | stop codon           | stop codon         | ykgB    | 3-carboxymuconate cyclase                                      | Unchanged stop codon                |
| 2                        | 2160010          | G                    | A                  | Alanine              | Threonine          | NA      | Adenine-specific methyltransferase                             | Neutral                             |
| 2                        | 2163622          | T                    | C                  | Threonine            | Alanine            | NA      | Adenine-specific methyltransferase, Type II restriction enzyme | Neutral                             |
| 1                        | 1003235          | C                    | A                  | Glycine              | Glycine            | NA      | Conserved protein                                              | Neutral                             |
| 1                        | 1664744          | G                    | T                  | Arginine             | Arginine           | mdlA    | ABC transporter, ATP-binding protein                           | Deleterious                         |
| 1                        | 875291           | C                    | A                  | Glycine              | Cysteine           | apbE    | Thiamine biosynthesis lipoprotein                              | Deleterious                         |
| 1                        | 2722438          | G                    | A                  | Glycine              | Arginine           | yniG    | Transporter, major facilitator superfamily MFS_1               | Deleterious                         |
| 1                        | 998311           | C                    | T                  | Glycine              | Serine             | pepF    | Oligoendopeptidase F                                           | Deleterious                         |
| 1                        | 122231           | G                    | T                  | Glutamic acid        | Aspartic acid      | dapF    | Diaminopimelate epimerase                                      | Neutral                             |
| 1                        | 2489719          | C                    | A                  | Alanine              | Alanine            | cueO    | Multicopper oxidase                                            | Neutral                             |
| 1                        | 2755833          | A                    | G                  | Alanine              | Alanine            | NA      | Transcriptional regulator, AraC family                         | Neutral                             |
| 1                        | 1873089          | G                    | A                  | Alanine              | Valine             | NA      | Putative protein without homology                              | Neutral                             |
| 1                        | 2635941          | T                    | C                  | Threonine            | Alanine            | tatD    | Mg-dependent Dnase, TatD family                                | Neutral                             |
| 1                        | 634973           | A                    | G                  | Methionine           | Threonine          | NA      | Conserved protein                                              | Neutral                             |
| 1                        | 1346543          | C                    | T                  | Arginine             | Glutamine          | merR    | Transcriptional regulator, MerR family                         | Deleterious                         |
| 1                        | 910696           | G                    | T                  | Aspartic acid        | Tyrosine           | pstS    | ABC transporter, phosphate-binding protein                     | Deleterious                         |
